# Supplementary material
Source: publisher figshare collection journal article supplement (https://springernature.figshare.com/ndownloader/files/23720777)
Supplement: Supplementary file 1 [file 23720777]

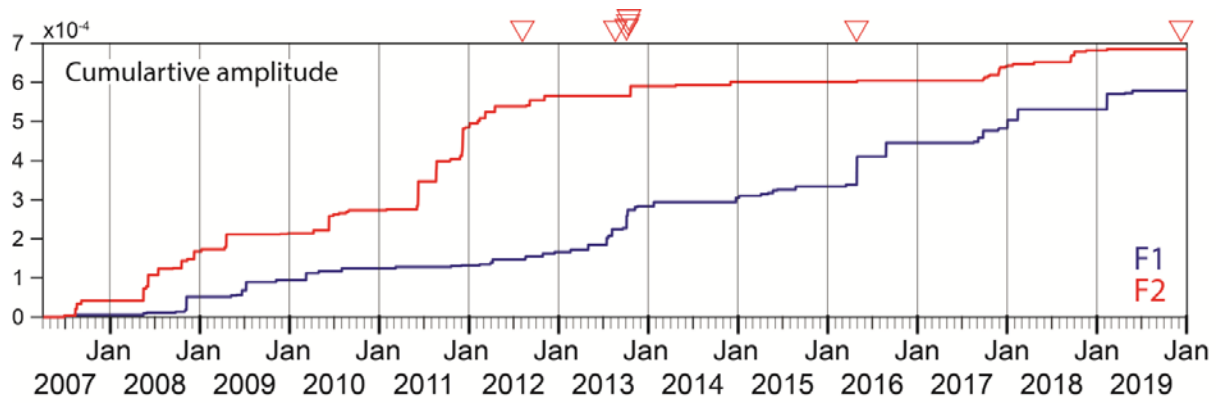

Additional file 5. Cumulative amplitude of F1 (blue) and F2 (red). The seven eruptions are denoted by reversed triangles (red).

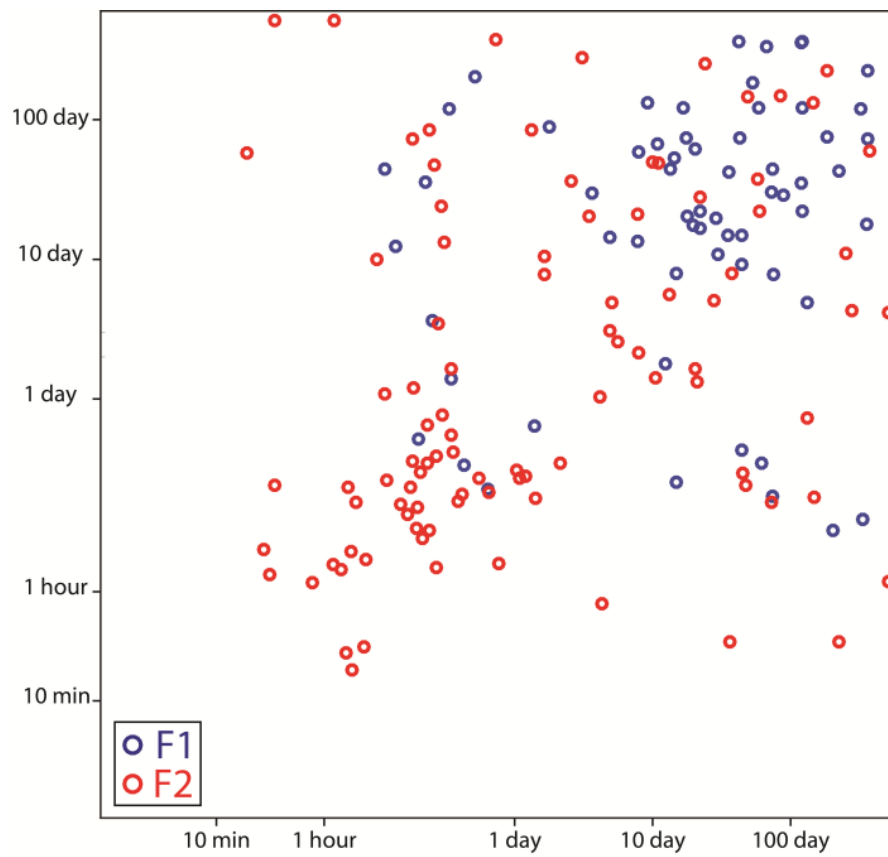

Additional file 5. Time map of two VLP families (F1 and F2). Axes indicate the time intervals between each VLP and its preceding (x axis) and subsequent (y axis) events. Swarm and intermittent VLPs are separately clustered.
